# Supplementary material for: Enhanced bioactivity and osteoinductivity of carboxymethyl chitosan/nanohydroxyapatite/graphene oxide nanocomposites
Source: Royal Society of Chemistry journal article supplement (doi:10.1039/c8ra00383a), 2018-01-01
Supplement: c8ra00383a1.pdf [file c8ra00383a1.pdf]

**Supporting Information for**  
**Enhanced bioactivity and osteoinductivity of carboxymethyl**  
**chitosan/nanohydroxyapatite/graphene oxide**  
**nanocomposites**

*Zhang Yu<sup>#</sup>, Caiwen Xiao<sup>#</sup>, Yazhuo Huang, Mingjiao Chen, Wei Wei, Xiaoxuan Yang,  
Huifang Zhou, Xiaoping Bi, Linna Lu, Jing Ruan\*, Xianqun Fan\**

Z. Yu, Dr. C. Xiao, Y. Huang, M.Chen, W.Weii, X.Yang,  
Dr. H. Zhou, Dr. X. Bi, Dr. L. Lu,  
Dr. J. Ruan, Prof. X. Fan  
Department of Ophthalmology  
Ninth People's Hospital  
Shanghai Jiao Tong University School of Medicine  
Shanghai Key Laboratory of Orbital Diseases and Ocular Oncology

Shanghai 200011, People's Republic of China  
E-mail: drjruan@163.com; fanxq@sjtu.edu.cn

<sup>#</sup> These authors contribute equally to this paper.

\* Corresponding authors

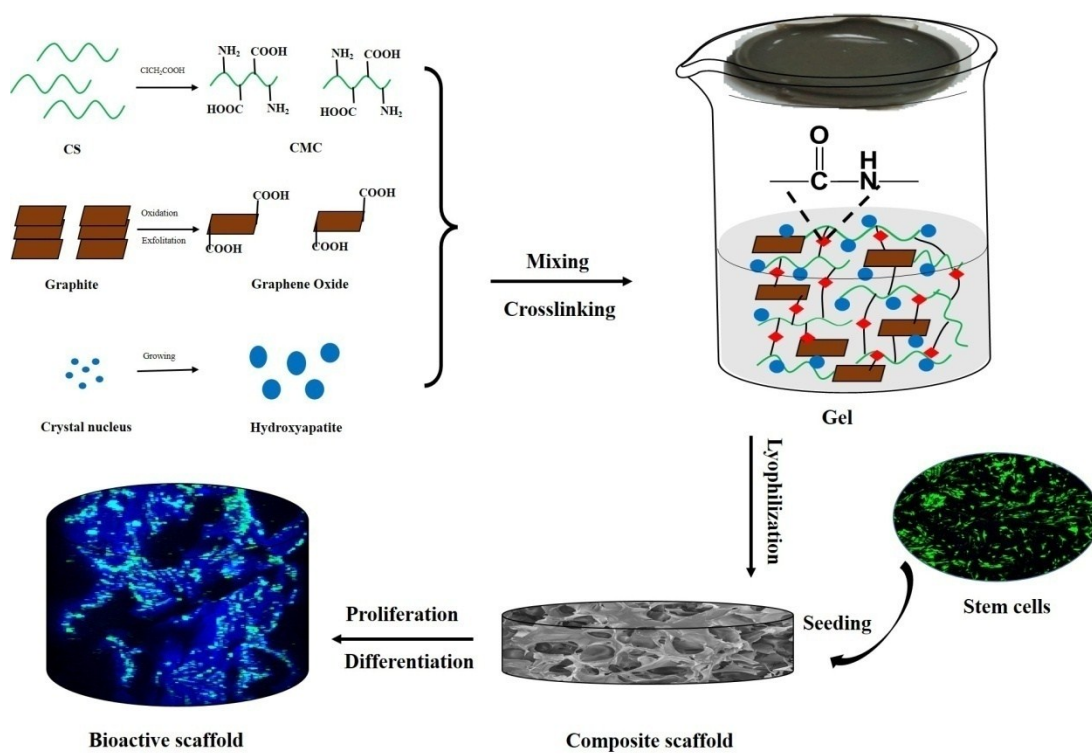

Supplementary Scheme 1. Schematic illustration of the preparation of CMC/nHA/GO scaffolds and their applications in vivo.

Supplementary Table 1. RNA Primers applied in this study

| <b>Genes</b> | <b>Primer sequences</b>          |
|--------------|----------------------------------|
| <b>OSX</b>   | Forward: CCTCTGCGGGACTCAACAAC    |
|              | Reverse: AGCCCATTAGTGCTTGTAAGG   |
| <b>OPN</b>   | Forward: GAAGTTTCGCAGACCTGACAT   |
|              | Reverse: GTATGCACCATTCAACTCCTCG  |
| <b>BSP</b>   | Forward: CCCCACCTTTTGGGAAAACCA   |
|              | Reverse: TCCCCGTTCTCACTTTCATAGAT |
| <b>OCN</b>   | Forward: CACTCCTCGCCCTATTGGC     |
|              | Reverse: CCCTCCTGCTTGGACACAAAG   |
| <b>ALP</b>   | Forward: GTGAACCGCAACTGGTACTC    |
|              | Reverse: GAGCTGCGTAGCGATGTCC     |
| <b>GAPDH</b> | Forward: CTGGGCTACACTGAGCACC     |
|              | Reverse: AAGTGGTCGTTGAGGGCAATG   |

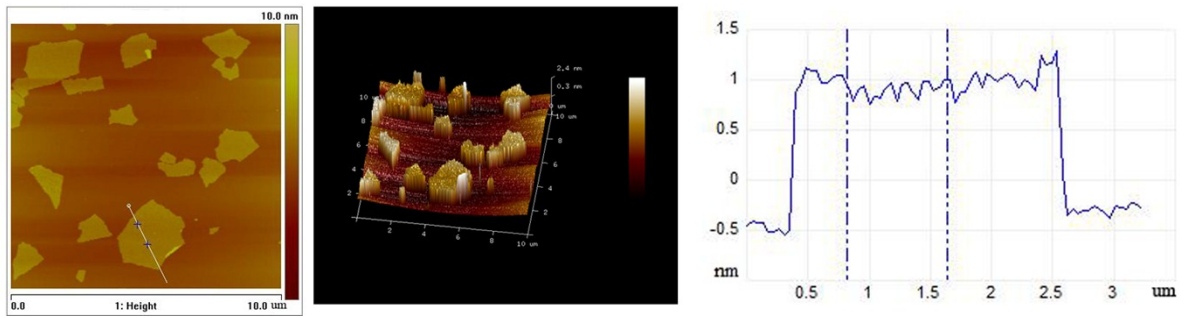

Supplementary Figure 1. The AFM of the GO.

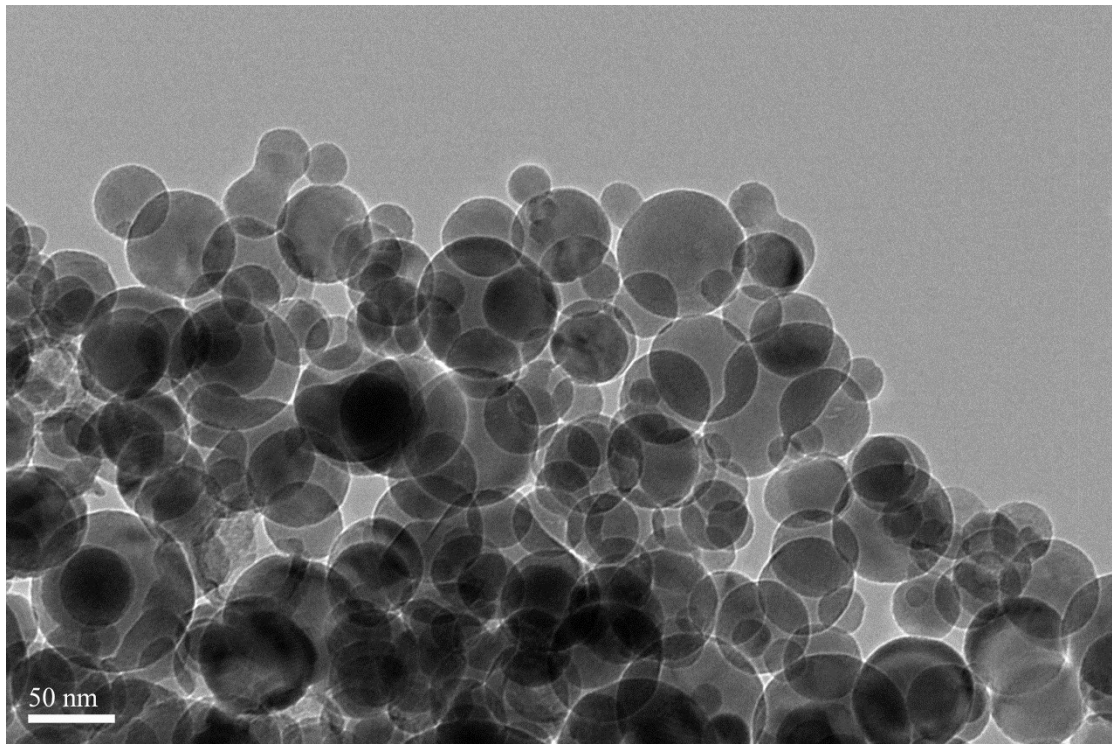

Supplementary Figure 2. TEM image of the nHA. (Scale bars: 50 nm)

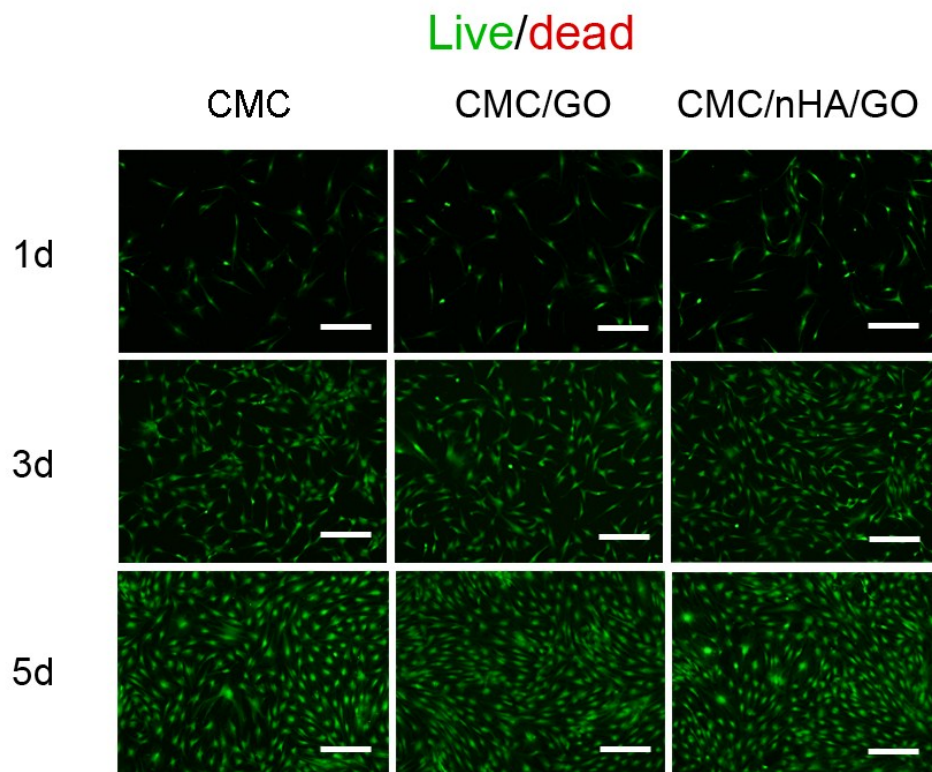

Supplementary Figure 3. Effects of the CMC/nHA/GO scaffold on cell viability. The live/dead staining images of hADSCs on CMC, CMC/GO and CMC/nHA/GO substrates after cultured in PM for 1, 3 and 5d. (Scale bars: 20  $\mu\text{m}$ )

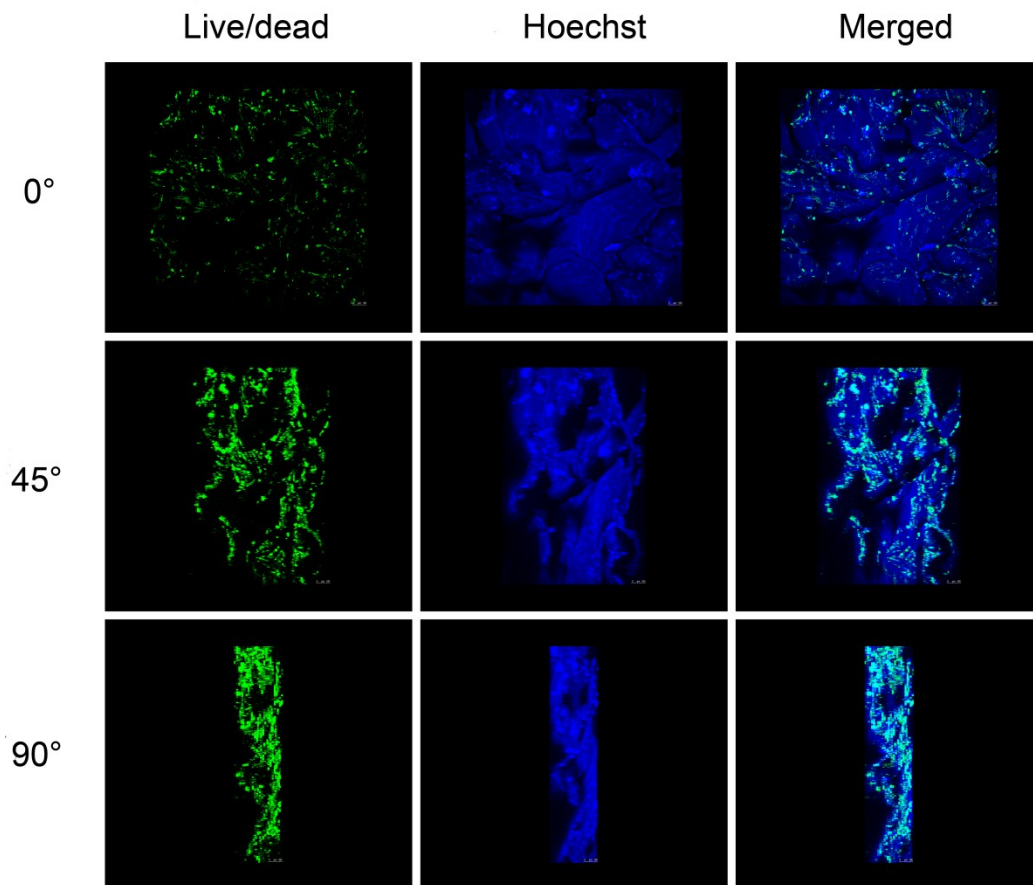

Supplementary Figure 4. Biocompatibility of the CMC/nHA/GO scaffold. The 3D live/dead staining images of hADSCs on the CMC/nHA/GO scaffold at different degrees (0°, 45° and 90°) by confocal microscopy.

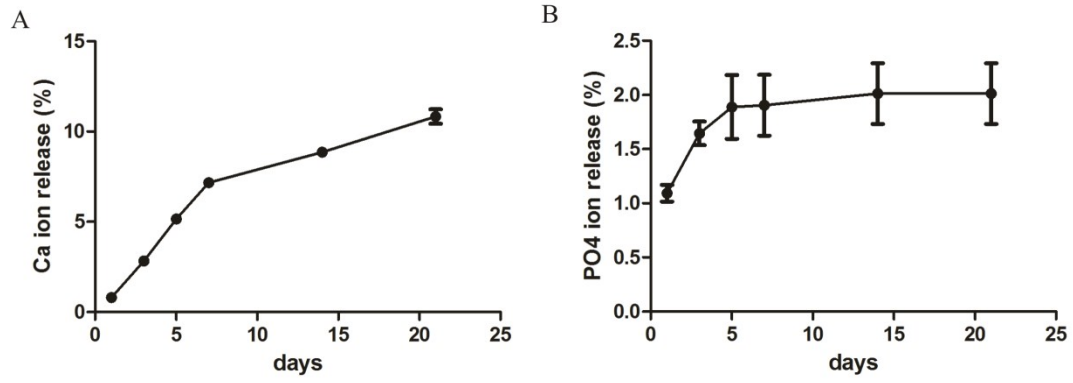

Supplementary Figure 5. Cumulative release of  $\text{Ca}^{2+}$  and  $\text{PO}_4^{3-}$  of the CMC/nHA/GO scaffold before and after immersion in dd- $\text{H}_2\text{O}$  of different durations (1, 3, 5, 7, 10, 14 and 21 days)



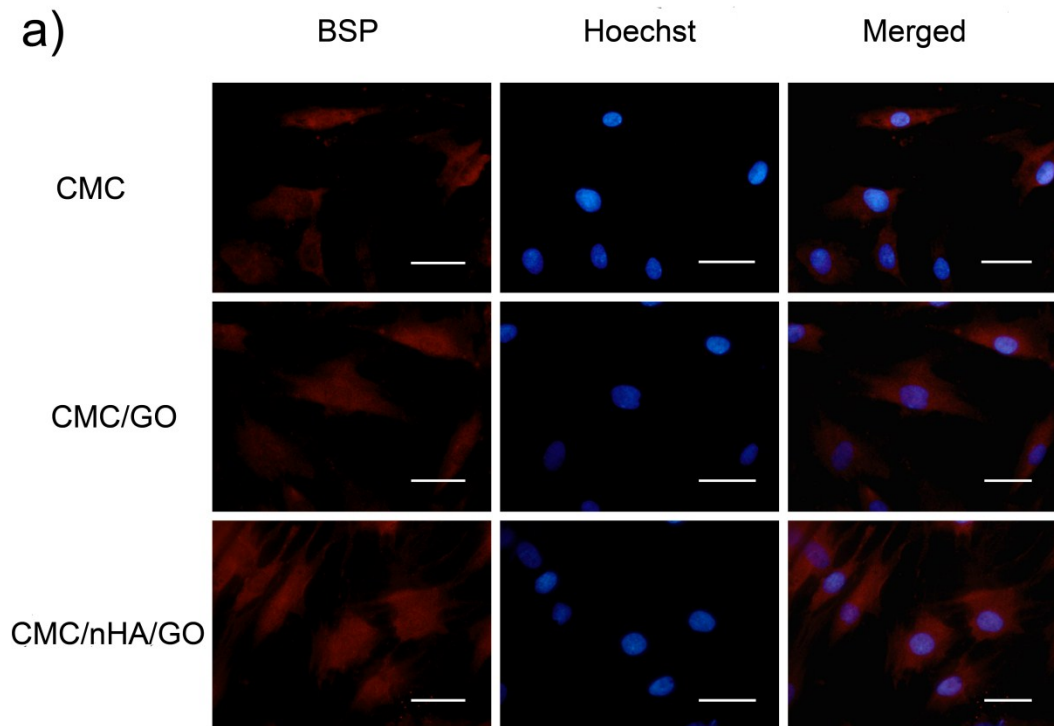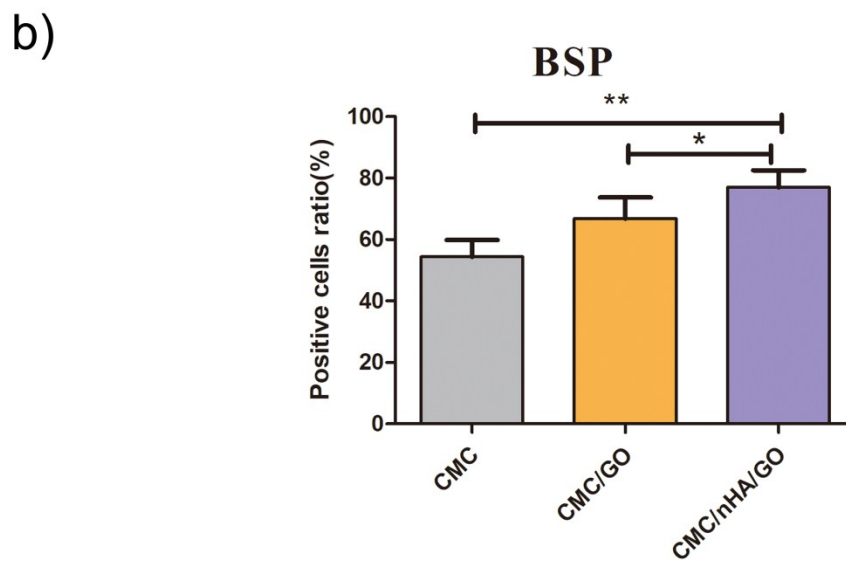

Supplementary Figure 6. Evaluation of the osteogenic differentiation of hADSCs on CMC/nHA/GO substrates. a) BSP immunofluorescence staining of hADSCs on substrates incubated in DM for 7d (Scale bars: 50  $\mu$ m); b) Positive cell ratios of BSP were determined by dividing the number of immune-positive cells to the number of nuclei stained with Hoechst (\*  $P < 0.05$ , \*\*  $P < 0.01$ , \*\*\*  $P < 0.001$ ).
